# Supplementary material
Source: PubMed Central journal article supplement (PMC4288682)
Supplement: JB.02192-14_zjb999093437so1.pdf [file JB.02192-14_zjb999093437so1.pdf]

## **Supplemental material**

### **Enantioselective regulation of lactate racemization by LarR**

#### **in *Lactobacillus plantarum***

Benoît Desguin, Phillipe Goffin, Nordine Bakouche, Aurélie Diman, Eric Viaene, Damien Dandoy, Laetitia Fontaine, Bernard Hallet, and Pascal Hols

**Fig. S1.** Phylogeny of LarR homologs.

**Fig. S2.** Sequence of the *L. plantarum larR-larA* intergenic region.

**Fig. S3.** rLarR purification.

**Fig. S4.** Comparison between the 20 *larA-larR* intergenic regions.

**Fig. S5.** Mutagenesis of the Lar-box.

**Table S1.** Primers used in this study.

**Table S2.** MALDI-TOF analysis of the two forms of rLarR.

**Table S3.** Bioinformatic analysis of LarR homologues.

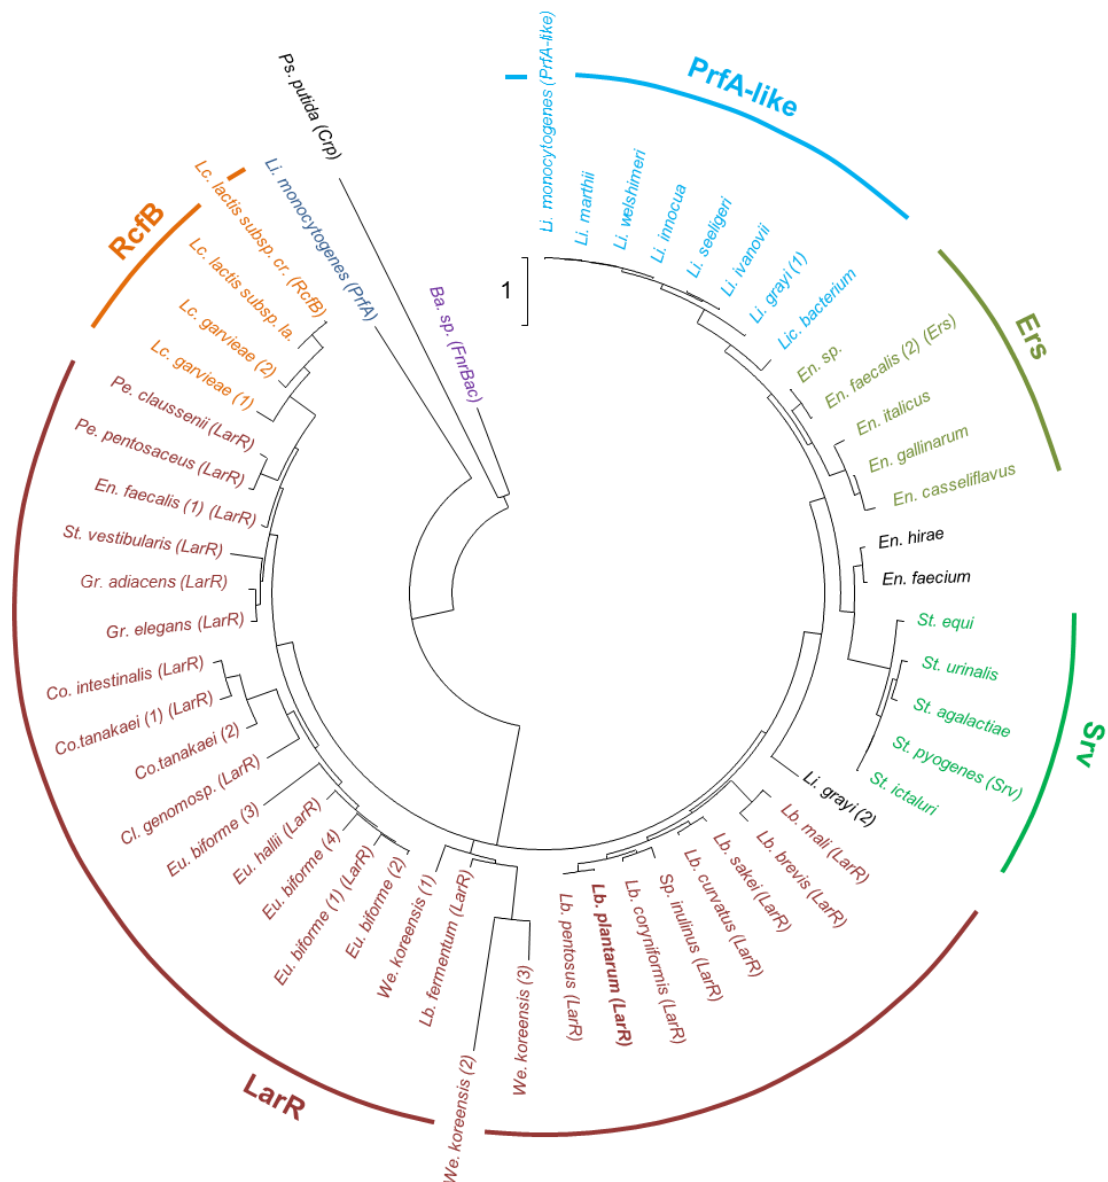

**Fig. S1. Phylogeny of LarR homologs.** The 55 Lar homologs used to construct the circular phylogram are reported in Table S3. The proteins identified as known members of the PrfA group (PrfA, PrfA-like, RcfB, Srv, Ers and Fnr<sub>bac</sub>) or suggested as LarR regulators based on their genetic context (LarR) are indicated between parentheses. Numbers in between parentheses correspond to the several LarR paralogs found in the same species as reported in Table S3. Crp is used as an outgroup to root the tree. The evolutionary history was inferred by using the Maximum Likelihood method based on the Le\_Gascuel\_2008 model (parameters: model LG+G) (1). The tree with the highest log likelihood is shown. The trees are drawn to scale, with branch lengths measured in the number of substitutions per site (scale bar, 1 substitution/site). All positions containing gaps and missing data were eliminated. Evolutionary analyses and multiple alignments using the ClustalW algorithm were conducted with MEGA6 (2).

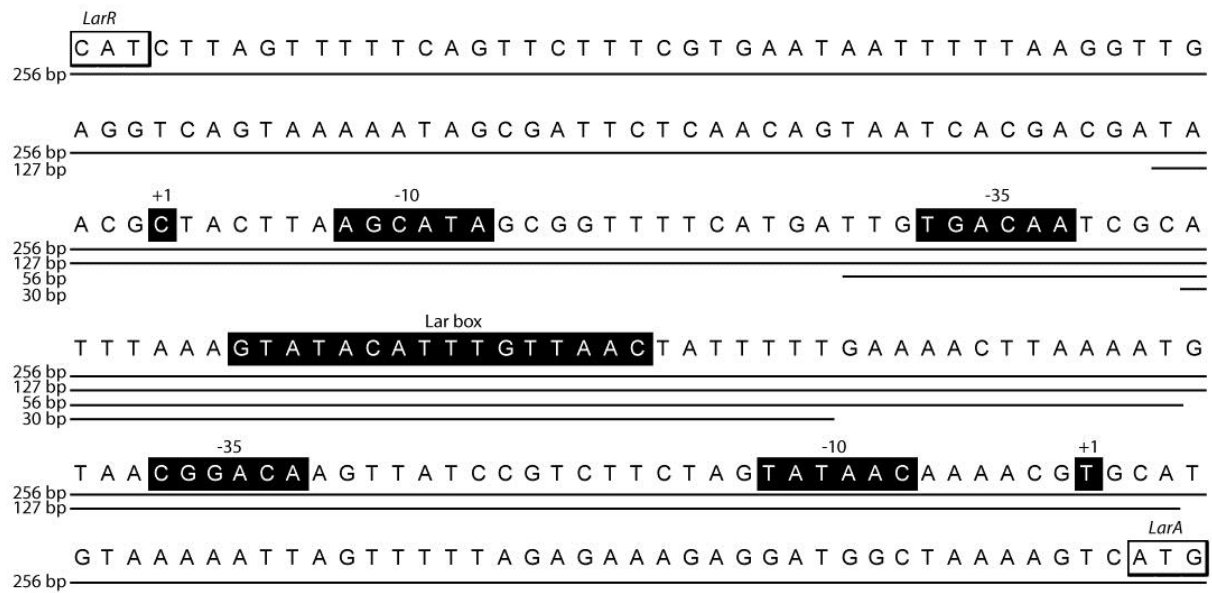

**Fig. S2. Sequence of the *L. plantarum* *larR-larA* intergenic region.** The promoter -35 and -10 boxes, the Lar box and transcriptional starts (+1) are highlighted in black. The *larR* and *larA* start codons are boxed. The positions of the three [<sup>32</sup>P] radiolabelled probes used in this study are drawn as lines below the sequence. The +1 transcription start of the P<sub>larA</sub> has been determined by primer extension. The +1 transcription start of P<sub>larR</sub> has been deduced from the positions of the predicted -10 and -35 boxes.

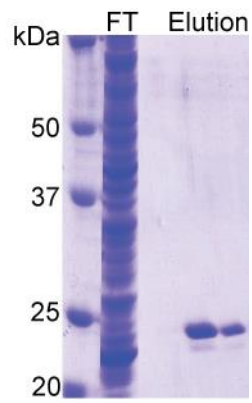

**Fig. S3. rLarR purification.** SDS-PAGE gel of the flow through (FT) and the elution fractions from rLarR purification by affinity chromatography on a Strep-Tactin column.

|                         | bp from the center of the Lar box |                                      |                                                  |                                          |                                   |                 |                        |
|-------------------------|-----------------------------------|--------------------------------------|--------------------------------------------------|------------------------------------------|-----------------------------------|-----------------|------------------------|
| species                 | <i>larR</i> side                  | -50.5                                | -40.5                                            | -30.5                                    | -20.5                             | -10.5           | -0.5 0.5               |
| <i>Cl. genomosp.</i>    |                                   | CATGGGAAATCTT                        | TCTCTCAGTCATA                                    | GTTTTCGCGCACATGCGTT                      | ATTAACAAATGTTAGC                  |                 |                        |
| <i>En. faecalis</i>     |                                   | TGACTAAGTTTCTGTTTGATT                | CGTTAACTATTATAAACACTCTCACCAACCTTTT               | GTTAGCAAATGTTACC                         |                                   |                 |                        |
| <i>Eu. halii</i>        |                                   | CATTCTTTTTCACCCCTTTCTTCATAAAAT       | AGTATATCATAT                                     | TTTAACAGATGTT                            | GGTAACATTTGATAAC                  |                 |                        |
| <i>G. adjacens</i>      |                                   | CTCCTCTAAGACAATTTCTTATACACACT        | ATTATCAT                                         | CTTACCACGAAAATATAC                       | GTTAACAAATGTTACT                  |                 |                        |
| <i>G. elegans</i>       |                                   | AAAAAATTCACCTTGCAATTT                | CTTAACATT                                        | ATTATCCT                                 | TTGATAAA                          | AATATTTTT       | GTTAACATATGTTAAC       |
| <i>L. coryniformis</i>  |                                   | TACAATTACTTAATGTATCATAGT             | CTTTTAGTAAA                                      | AATTAGCGACAGCATT                         | TAAAGTATACATTTGTTAAC              |                 |                        |
| <i>L. fermentum</i>     |                                   | CATACCTATTTGA                        | GTTTAGCACACTTCCAGTCAT                            | TGTGAAGTTAATTTTTCTTAT                    | GTAACAAATCATACG                   |                 |                        |
| <i>L. brevis</i>        |                                   | AAAATTAATTATC                        | GTTAGCAAAGTCCTAT                                 | CCTTAGCGAAAAGGATACCCCTTCGC               | CTTAACATTTGGTAAT                  |                 |                        |
| <i>L. mali</i>          |                                   | ATTATGTAAAACCTTATTAGTT               | GATTTAAATAATA                                    | CTCCTAATTTTATCAT                         | ATCATCTTATCAATTGGTAAT             |                 |                        |
| <i>L. pentosus</i>      |                                   | ACAATGACGCTTCTTAAGCATAGCGGTTTTCGTGAT | TGTGACAA                                         | TCGCATTTAAAGTATACATTTGTTAAC              |                                   |                 |                        |
| <i>L. plantarum</i>     |                                   | ACGATAACGCTACTTAAGCATAGCG            | GTTTTCATGAT                                      | TGTGACAA                                 | TCGCATTTAAAGTATACATTTGTTAAC       |                 |                        |
| <i>St. vestibularis</i> |                                   | ATCTTAATAACACTAATAATA                | CACCTATACTACCAATTCCTATATCATCCT                   | TTGTTAAC                                 | ATCAAATGATACT                     |                 |                        |
| <i>L. sakei</i>         |                                   | TAATCATTTATACTTATTATT                | CGATAACTTAAGTCTTAAGTGTA                          | CGCTATTTTAATTGAACATTTGTTAAC              |                                   |                 |                        |
| <i>Sp. inulinus</i>     |                                   | TGTTATCTATATTCT                      | ATTTTAACGCCATTT                                  | CAGCTAATATATATCACAAATAAAGGAAACATTTGTTAAC |                                   |                 |                        |
| <i>Eu. biforme</i>      |                                   | CATATTCGCTCTCCTTTACCA                | GTTTTGGAT                                        | TATAACAA                                 | TACTCCAAATTTTTCGAAACAACAAATGTTAAC |                 |                        |
| <i>Pe. clausenii</i>    |                                   | ATATAATCCCCCTGCACTTAT                | GTGTTTTATTATCTTTAAATTCCGATACGCGCACT              | GTAACAAATGTTACA                          |                                   |                 |                        |
| <i>Pe. pentosaceus</i>  |                                   | TAAAAGTAAATAAT                       | ATGTACAGACATCT                                   | ATTATCAT                                 | AAGAAAAAATTGTGAGAAGT              | GTAACAAATGTTATA |                        |
| <i>L. curvatus</i>      |                                   | TACTAATCATTAAATAACTTTA               | ATCTAAATTATA                                     | CGTCTTGAATACTATAAAGTT                    | GTTATCATTGTTACA                   |                 |                        |
| <i>Co. intestinalis</i> |                                   | CGCCCCTTTCAGATTTGTTAAG               | CCGACCACTGTATACACCTAGCGAAACGTTGAGTTGACATTTGGTAAC |                                          |                                   |                 |                        |
| <i>Co. tanakaei</i>     |                                   | CCTCCCCTACCTGACCTCTGGAA              | AGCGCAACTCTATCGGACTGTGAAGCCGAAGC                 | TGCACCAATGGTAAC                          |                                   |                 |                        |
| <b>consensus</b>        |                                   |                                      |                                                  |                                          |                                   | T               | GTTAACATTTGGTAAC<br>AA |

| species                    | bp from the center of the Lar box |                 |                           |                          |                        |                           | <i>larA</i> side       |
|----------------------------|-----------------------------------|-----------------|---------------------------|--------------------------|------------------------|---------------------------|------------------------|
|                            | -0.5                              | 0.5             | 10.5                      | 20.5                     | 30.5                   | 40.5                      |                        |
| <i>Cl. genomosp.</i>       | ATTAACAAATGTTAGC                  | ATTTTTT         | TGAGCTAACCGGCAATTATTTTTTC | CGT                      | GCTAAATTT              | TAGGTC                    | CAAGTTGCGA             |
| <i>En. faecalis</i>        | GTTAGCAAATGTTACC                  | CACAATAA        | GGACTGTGTGATTCCTAAATTT    | CATT                     | TATACTTAGTCT           | CGT                       | AAAATAT                |
| <i>Eu. halii</i>           | GGTAACATTTGATAAC                  | ATTTTTT         | TATTATTATCT               | TTT                      | ACTAACACTTTTT          | ATTAATATGAAAT             | GTTGTTTTC              |
| <i>G. adjacens</i>         | GTTAACAAATGTTACT                  | AACCTTT         | TGAGACTTCTGCTGTGCGTTATTT  | GAGTATACT                | TATAAT                 | CGACAA                    | ACAA                   |
| <i>G. elegans</i>          | GTTAACATATGTTAAC                  | ACCATTT         | TGATTTACATT               | CAAAA                    | GAAAAAATAA             | TATACTATATT               | GTTAGCTAT              |
| <i>L. coryniformis</i>     | GTATACATTTGTTAAC                  | CTACTTT         | GAAAATGCTAAA              | CGTGGC                   | AGACA                  | AGCCAAAA                  | AAGATGCGTATAACTG       |
| <i>L. fermentum</i>        | TGTAACAAATCATACG                  | CTTATTTT        | TGACGCTGAAA               | GCAACGCA                 | ACAATGAGAGTATTTT       | TGAAA                     | ACTGAGA                |
| <i>L. brevis</i>           | CTTAACATTTGGTAAT                  | GACACTGGCT      | ATTGATAT                  | CGATTATTC                | ACTTTCATAGT            | GAGGAT                    | TGTCAATGAA             |
| <i>L. mali</i>             | CTTATCAATTGGTAAT                  | GTTTAA          | AGAA                      | CATACACTTAAATA           | ATGTTTT                | AAACAATACTTAT             | TGACAAGAAA             |
| <i>L. pentosus</i>         | GTATACATTTGTTAAC                  | TATTTT          | TGAAA                     | ACTTGAAATGTAGC           | GGACA                  | ACCGTCGCGACTACTAGTATAACAA |                        |
| <b><i>L. plantarum</i></b> | GTATACATTTGTTAAC                  | TATTTT          | TGAAA                     | CTTAAATGTAAC             | GGACA                  | AGTTATCCGTCTTCTAGTATAACAA |                        |
| <i>St. vestibularis</i>    | AACATCAAATGATACT                  | TATGTAT         | TTTAAA                    | AAAAGACTTATAA            | ACTGGT                 | GTAAGTATTAAT              | TAATAAAGGAG            |
| <i>L. sakei</i>            | TTGAACATTTGTTAAC                  | ATTTT           | TGAGC                     | TTTCTTTTGTAAC            | CGTTTTAATGTTGTCTATAA   | ATTATACCGCAT              | CC                     |
| <i>Sp. inulinus</i>        | GGAAACATTTGTTAAC                  | ATTTTT          | TGATGATAGC                | AAACGGAA                 | CCGACA                 | ACCTTTTTGTTTTGATT         | TATAACAG               |
| <i>Eu. biforme</i>         | AACAACAAATGTTAAC                  | ATAAAA          | ATGAG                     | GTTTCATAATTATTTA         | ATTCGGATTATATT         | AATTCGGT                  | AAAAAA                 |
| <i>Pe. clausenii</i>       | TGTAACAAATGTTACA                  | CCTAATT         | GTTGTATCCA                | CGACCACTTATCTTTCCTAACAT  | GTTGTAT                | AGCGCCAA                  |                        |
| <i>Pe. pentosaceus</i>     | TGTAACAAATGTTATA                  | CCCAAAT         | GTGATAC                   | CGGTCCG                  | ATTTTACATAGCCTAATATATT | GTCTAGC                   | GCCAA                  |
| <i>L. curvatus</i>         | GTTATCATTTGTTACA                  | CCTAAA          | AAGTAATA                  | ATGAAA                   | TGTTGTT                | CATAAAT                   | TATACCGCATCCTTTTCAGAAA |
| <i>Co. intestinalis</i>    | GTTGACATTTGGTAAC                  | TACATTC         | GACATAACGCGCAC            | CCTTTCAA                 | ACCCCATAGTT            | ACCCCG                    | GCTTAAAC               |
| <i>Co. tanakaei</i>        | TGCACCAAATGGTAAC                  | AAACAA          | AGGT                      | CAGACCGCCCGATGCCATCACAAC | CATAGT                 | TACCCCT                   | CGTCCGTA               |
| <b>consensus</b>           | <b>GTTAACA</b>                    | <b>TTTGGTAA</b> | <b>TTTG</b>               |                          |                        |                           |                        |
|                            | <b>AA</b>                         |                 |                           |                          |                        |                           |                        |

**Fig. S4. Comparison between the 20 *larA-larR* intergenic regions.** The suspected +1 transcription starts, the promoter -10 boxes, -35 boxes and the Lar boxes are highlighted in red, yellow, orange, and green, respectively. The identified half-Lar boxes are boxed in black. The consensus sequence is shown below the sequences.

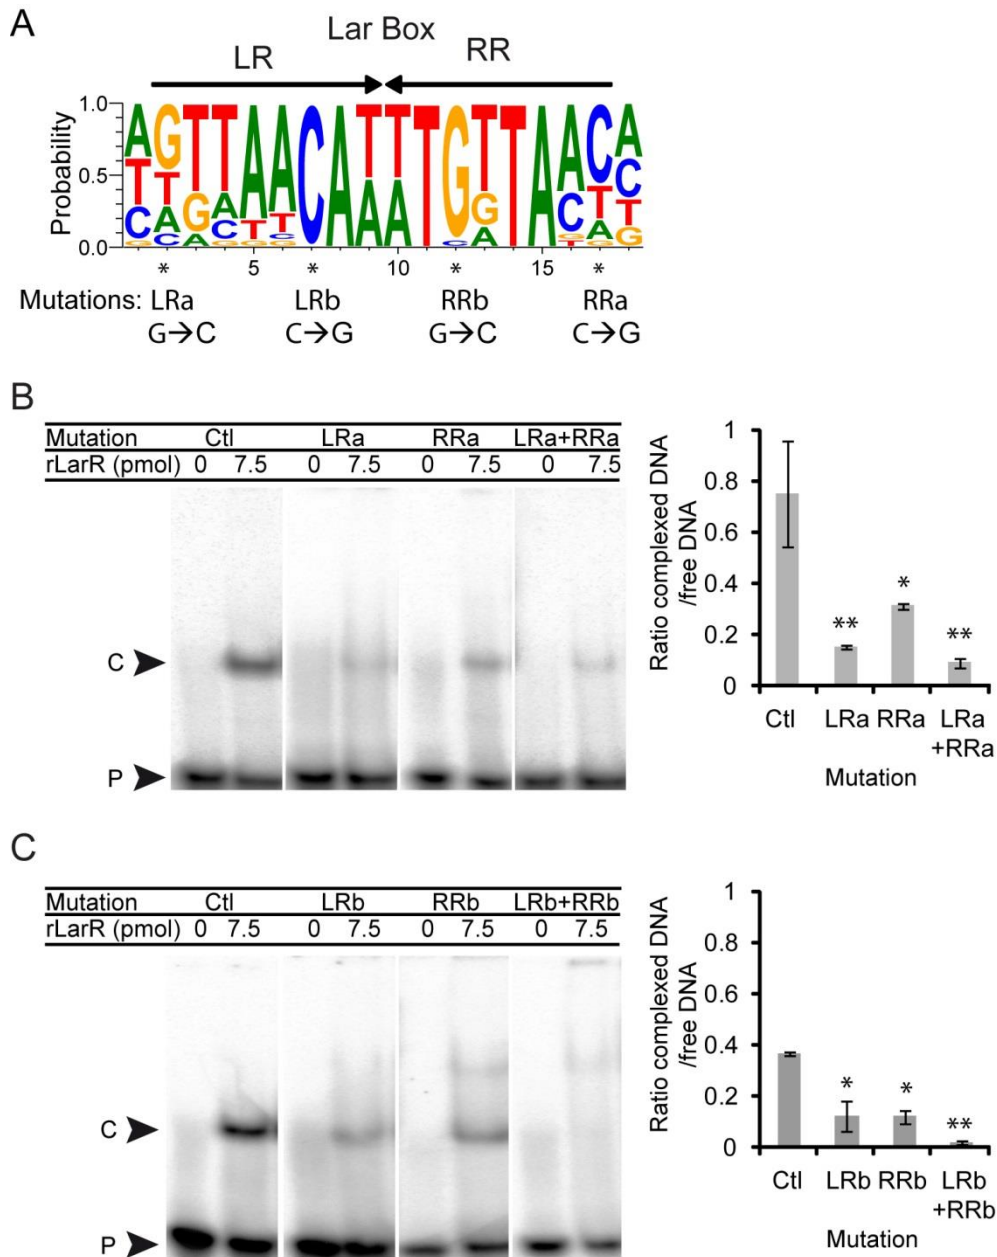

**Fig. S5. Mutagenesis of the Lar-box.** (A) Display of mutations LLa, LRb, RRa, and RRb performed in the left and right inverted repeats (LR and RR) of the Lar-box (inverted arrows). The mutations are indicated underneath the logo. (B and C) Left panels: EMSA of 56-bp [<sup>32</sup>P] radiolabeled probes containing the native Lar-box or mutated Lar-boxes in absence or presence of purified rLarR. Ctl, control with the native Lar-box. The rLarR-DNA complex (C) and unbound probe (P) are indicated by arrow heads. Right panels: mean values of ratios of complexed DNA/free DNA of EMSA as in left panels. Data are from 3 replicates from one significant experiment. The error bar represents the standard deviation. Significance based on Student *t*-test; \* *p*-value < 0.05, \*\* *p*-value < 0.01. Mutated Lar-boxes are compared to the native Lar-box (Ctl).

**Table S1. Primers used in this study.**

| Primer name                                                                                   | Sequence <sup>a,b</sup>                                                          | Mutant strain or plasmid       |
|-----------------------------------------------------------------------------------------------|----------------------------------------------------------------------------------|--------------------------------|
| <b>Primers used for construction of the deletion vector</b>                                   |                                                                                  |                                |
| LP101A1                                                                                       | 5'-CGGGGTACCAATCTTCAAACGGCGTGGTTAGACG-3'                                         |                                |
| LP103A4                                                                                       | 5'-GCTCTAGAGATGTTAGTTACCTCTTAGATCAAATTGC-3'                                      |                                |
| LP105B4                                                                                       | 5'-GGACTAGTCTTACCAGCACCGTAGATGACCTCC-3'                                          |                                |
| LP103B4                                                                                       | 5'-GCTCTAGAAAGTGTTCGGCTAAACCATGATAGG-3'                                          | pGIR002                        |
| LOX66A5-2                                                                                     | 5'-GCTCTAGATACCGTTCGTATAATGTATGCTATACGAAGTTATTGCAGTTTAAATTTCG<br>GTCCTCG-3'      |                                |
| LOX71A5-2                                                                                     | 5'-CTCTAGATACCGTTCGTATAGCATAACATTATACGAAGTTATAAGTACAGTCGGCATT<br>ATTC-3'         |                                |
| <b>Primers used for the validation of the deletion</b>                                        |                                                                                  |                                |
| LP096UP1                                                                                      | 5'-CGGGGTACCTAGCTGAGATCAATGCGAACTTGG-3'                                          | LR0002                         |
| LP105B1                                                                                       | 5'-GCTCTAGAAAAGCGTCTAAATAAAGTGTTC-3'                                             |                                |
| <b>Primers used for the construction of overexpression and purification vectors</b>           |                                                                                  |                                |
| LP103OXA1                                                                                     | 5'-CATCCCATGGCAAGCTGGAGTCACCCGCAGTTCGAGAAAGGTGCTGG<br>TATGGTATTAAGTATTTGAATAT-3' | pGIR991                        |
| LP103OXB1                                                                                     | 5'-GCGGAATTCAAAACGGCGACGGTCCAGACGGGAG-3'                                         |                                |
| Lp1031                                                                                        | 5'-GGGGTACCTAAAACGGCGACGGTCCAGACG-3'                                             | pGIR090                        |
| Lp1032                                                                                        | 5'-CATGCCATGGTATTAAGTATTTGAATATTTACT-3'                                          |                                |
| <b>Primers used for the construction of controlled gene expression vectors</b>                |                                                                                  |                                |
| PSIP103-104A1                                                                                 | 5'-CGGGATCCCATCTTAGTTTTTCAGTTCTTTTCG-3'                                          | pGIR003                        |
| PSIP103-104B2                                                                                 | 5'-CATGCCATGGCTTTTAGCCATCCTTCTCTA-3'                                             |                                |
| <b>Primers used for the sequencing of vectors</b>                                             |                                                                                  |                                |
| P32B1                                                                                         | 5'-CGCGGATCCGAATGCATTCTGCTGAAACGATTGCCATTTTC-3'                                  | PGIR002                        |
| CATA1                                                                                         | 5'-AAAACTGCAGATGAAGAAAGCAGACAAGTAAGC-3'                                          |                                |
| UP_PNZ8048                                                                                    | 5'-TAGATACAATGATTTTCGTTTCG-3'                                                    | pGIR090/091                    |
| CAT1                                                                                          | 5'-AATTGTCAGATAGGCCTAATGACTGG-3'                                                 |                                |
| GUSA2                                                                                         | 5'-TTCCATGATTTCTTTAACTATGC-3'                                                    | pGIR003                        |
| GUSB2                                                                                         | 5'-TTTTGGCTATCAATCAAAGCAACACG-3'                                                 |                                |
| <b>Primers used for the amplification of P<sub>32</sub> radiolabeled and unlabeled probes</b> |                                                                                  |                                |
| LarBox_A1                                                                                     | 5'-CATCTTAGTTTTTCAGTTCTTTTCG-3'                                                  | Lar box 256 bp                 |
| LarBox_B1                                                                                     | 5'-CATGACTTTTAGCCATCCTCTTTC-3'                                                   |                                |
| LarBox_A2                                                                                     | 5'-TAACGCTACTTAAGCATAGCGGTTTTTC-3'                                               | Lar box 127 bp                 |
| LarBox_B2                                                                                     | 5'-TGCACGTTTTGTTATACTAGAAGAC-3'                                                  |                                |
| Lar-A_A                                                                                       | 5'-CGATCGATATGAAAAAGGCCTACGCACGCGAGGGTC-3'                                       | Unspecific DNA 137 bp          |
| Lar-B_B                                                                                       | 5'-GCATCGATTTGCCGCCACTTGTGTAATATTTTC-3'                                          |                                |
| <b>Primers used for primer extension</b>                                                      |                                                                                  |                                |
| LP104PE1                                                                                      | 5'-TTGTTATGATATGTTGCAGCTTGC-3'                                                   |                                |
| <b>Primers used directly as P<sub>32</sub> radiolabeled probes</b>                            |                                                                                  |                                |
| LarBox_lp1                                                                                    | 5'-ATTTAAAGTATACATTTGTTAACTATTTTT-3'                                             | <i>L. plantarum</i><br>Lar box |
| LarBox_lp1                                                                                    | 5'-TAAATTTCAATGTAACAATTGATAAAAA-3'                                               |                                |
| LarBox_cons1                                                                                  | 5'-ATTTAAAGTAACTTTGTTAACTATTTTT-3'                                               | Consensus<br>Lar box           |
| LarBox_cons1                                                                                  | 5'-TAAATTTCAATGTAACAATTGATAAAAA-3'                                               |                                |
| LarBox_rand1                                                                                  | 5'-ATTTAAAGTTCTGATTTATAAACTATTTTT-3'                                             | Random Lar<br>box              |
| LarBox_rand2                                                                                  | 5'-TAAATTTCAAGACTAAATATTTGATAAAAA-3'                                             |                                |
| LarBox3_A                                                                                     | 5'-TTGTGACAATCGCATTTAAAGTATACATTTGTTAACTATTTTTGAAAACCTAAAAAT-3'                  | Wild type                      |
| LarBox3_B                                                                                     | 5'-ATTTAAAGTTTTCAAAAATAGTTAAACAATGTATACTTTAAATGCGATTGTCACAA-3'                   |                                |
| LarBox3'3_A                                                                                   | 5'-TTGTGACAATCGCATTTAAAGTATACATTTGTTAACTATTTTTGAAAACCTAAAAAT-3'                  | Mutation LRA                   |
| LarBox3'3_B                                                                                   | 5'-ATTTAAAGTTTTCAAAAATAGTTAAACAATGTATACTTTAAATGCGATTGTCACAA-3'                   |                                |
| LarBox3'4_A                                                                                   | 5'-TTGTGACAATCGCATTTAAAGTATACATTTGTTAAAGTATTTTTGAAAACCTAAAAAT-3'                 | Mutation RRA                   |
| LarBox3'4_B                                                                                   | 5'-ATTTAAAGTTTTCAAAAATACTTAAACAATGTATACTTTAAATGCGATTGTCACAA-3'                   |                                |
| LarBox3''_A                                                                                   | 5'-TTGTGACAATCGCATTTAAAGTATACATTTGTTAAAGTATTTTTGAAAACCTAAAAAT-3'                 | Mutation<br>LRA+RRA            |
| LarBox3''_B                                                                                   | 5'-ATTTAAAGTTTTCAAAAATACTTAAACAATGTATACTTTAAATGCGATTGTCACAA-3'                   |                                |
| LarBox3'5_A                                                                                   | 5'-TTGTGACAATCGCATTTAAAGTATAGATTTGTTAACTATTTTTGAAAACCTAAAAAT-3'                  | Mutation LRb                   |



|                                                 |                                                                         |                                |
|-------------------------------------------------|-------------------------------------------------------------------------|--------------------------------|
| LarBox3'5_B                                     | 5'-ATTTTAAGTTTTCAAAAATAGTTAACAAT <u>CTATACTTTAAATGCGATTGTCACAA</u> -3'  |                                |
| LarBox3'6_A                                     | 5'-TTGTGACAATCGCATTAAAGTATACATTT <u>CTTA</u> ACTATTTTTGAAAACCTAAAAT-3'  | Mutation RRb                   |
| LarBox3'6_B                                     | 5'-ATTTTAAGTTTTCAAAAATAGTTAAGAAATGTATACTTTAAATGCGATTGTCACAA-3'          |                                |
| LarBox3'7_A                                     | 5'-TTGTGACAATCGCATTAAAGTATAGATTT <u>CTTA</u> ACTATTTTTGAAAACCTAAAAT-3'  | Mutation                       |
| LarBox3'7_B                                     | 5'-ATTTTAAGTTTTCAAAAATAGTTAAGAAAT <u>CTATACTTTAAATGCGATTGTCACAA</u> -3' | LRb+RRb                        |
| <b>Primers used for QuickChange mutagenesis</b> |                                                                         |                                |
| QC_LarBox_A3                                    | 5'-ATCGCATTAAAGTATACATTT <u>CTTA</u> ACTATTTTTGAAAAC-3'                 | pGIR003B<br>(mutation RRb)     |
| QC_LarBox_B3                                    | 5'-TAGTTAAGAAATGTATACTTTAAATGCGATTGTCACAATCATG-3'                       |                                |
| QC_LarBox_A2                                    | 5'- <b>CATTTGTTAACT</b> ATTTTTCAAAAACCTAAAATGTAACGGAC-3'                | pGIR003C<br>(mutation RRc)     |
| QC_LarBox_B2                                    | 5'-TTTAAGTTTTGAAAATAGTTAACAATGTATACTTTAAATGCG-3'                        |                                |
| QC_LarBox_A4                                    | 5'- <b>AACT</b> ATTTTTCAAAAACCTAAAATCTAACGGACAAGTTATCC-3'               | pGIR003D<br>(mutation RRc+RRd) |
| QC_LarBox_B4                                    | 5'-GTCCGTTAGATTTTAAGTTTTGAAAATAGTTAACAATG-3'                            |                                |

<sup>a</sup> Restriction sites and mutations introduced in the primers are underlined

<sup>b</sup> Lar box sequences are in bold

**Table S2. MALDI-TOF analysis of the two forms of rLarR.**

| <b>1<sup>st</sup> band</b> |                 | <b>Match to: LarR Score: 470 Expect: 1.6e-045</b> |                 |              |             |                                |                  |
|----------------------------|-----------------|---------------------------------------------------|-----------------|--------------|-------------|--------------------------------|------------------|
| <b>Start - End</b>         | <b>Observed</b> | <b>Mr(expt)</b>                                   | <b>Mr(calc)</b> | <b>Delta</b> | <b>Miss</b> | <b>Sequence</b>                |                  |
| 34 - 51                    | 2209.0051       | 2207.9978                                         | 2200.1003       | -0.1025      | 0           | R.HTYLTYHGLAEHYTYVLK.D         | (Ion score 98)   |
| 57 - 65                    | 1015.5026       | 1014.4953                                         | 1014.5458       | -0.0505      | 0           | K.NSILQDGR.E                   | (Ion score 61)   |
| 66 - 82                    | 1994.0045       | 1992.9972                                         | 1993.0884       | -0.0911      | 0           | R.EYNLSYIAKPDVISLLR.D          | (No match)       |
| 88 - 96                    | 1063.4653       | 1062.458                                          | 1062.5094       | -0.0514      | 0           | R.STDQPFNVR.I                  | (Ion score 44)   |
| 97 - 109                   | 1619.6981       | 1618.6908                                         | 1618.7627       | -0.0719      | 0           | R.IESEYATFYQVNR.V              | (Ion score 96)   |
| 115 - 127                  | 1554.7046       | 1553.6973                                         | 1553.7725       | -0.0752      | 0           | K.YVNSTPELQNYVK.N              | (Ion score 81)   |
| 133 - 140                  | 972.5323        | 971.525                                           | 971.5763        | -0.0513      | 1           | K.KLSENILR.L                   | (No match)       |
| 134 - 140                  | 844.4393        | 843.432                                           | 843.4814        | -0.0494      | 0           | K.LSENILR.L                    | (Ion score 30)   |
| 167 - 192                  | 2853.303        | 2852.2957                                         | 2852.4377       | -0.142       | 1           | R.KVNEGILIDFVVTNDDIAGFCGISSR.S | Propionamide (C) |
| 168 - 192                  | 2725.2021       | 2724.1948                                         | 2724.3428       | -0.148       | 0           | K.VNEGILIDFVVTNDDIAGFCGISSR.S  | Propionamide (C) |

  

| <b>2<sup>nd</sup> band</b> |                 | <b>Match to: LarR Score: 280 Expect: 1.5e-026</b> |                 |              |             |                        |                |
|----------------------------|-----------------|---------------------------------------------------|-----------------|--------------|-------------|------------------------|----------------|
| <b>Start - End</b>         | <b>Observed</b> | <b>Mr(expt)</b>                                   | <b>Mr(calc)</b> | <b>Delta</b> | <b>Miss</b> | <b>Sequence</b>        |                |
| 34 - 51                    | 2209.1116       | 2200.1043                                         | 2200.1003       | 0.004        | 0           | R.HTYLTYHGLAEHYTYVLK.D | (No match)     |
| 57 - 65                    | 1015.5601       | 1014.5528                                         | 2208.1003       | 0.007        | 0           | K.NSILQDGR.E           | (Ion score 53) |
| 66 - 82                    | 1994.0621       | 1993.0548                                         | 1014.5458       | -0.0335      | 0           | R.EYNLSYIAKPDVISLLR.D  | (No match)     |
| 88 - 96                    | 1063.5229       | 1062.5156                                         | 1993.0884       | 0.0062       | 0           | R.STDQPFNVR.I          | (Ion score 46) |
| 97 - 109                   | 1619.7723       | 1618.765                                          | 1062.5094       | 0.0023       | 0           | R.IESEYATFYQVNR.V      | (Ion score 89) |
| 115 - 127                  | 1554.7827       | 1553.7754                                         | 1618.7627       | 0.0029       | 0           | K.YVNSTPELQNYVK.N      | (Ion score 50) |
| 134 - 140                  | 844.4944        | 843.4871                                          | 843.4814        | 0.0057       | 0           | K.LSENILR.L            | (No match)     |
| 144 - 150                  | 807.4059        | 806.3986                                          | 806.4142        | -0.0156      | 1           | R.MVMNGKK.G            | (No match)     |

The MASCOT search engine was used to identify the proteins after Maldi-TOF analysis.

**Table S3. Bioinformatic analysis of LarR homologues.**

| Species                                                                | N <sup>oa</sup> | Protein <sup>b</sup> | Accession      | Annotation                                                                                               | LarA <sup>c</sup> |
|------------------------------------------------------------------------|-----------------|----------------------|----------------|----------------------------------------------------------------------------------------------------------|-------------------|
| <i>Bacillus</i> sp. 1NLA3E                                             |                 | Fnr <sub>Bac</sub>   | ZP_09599669.1  | cyclic nucleotide-binding protein                                                                        |                   |
| <i>Clostridiales</i> genomosp. BVAB3 str. UPII9-5                      |                 | LarR                 | YP_003475460.1 | Crp/Fnr family transcriptional regulator                                                                 | YP_003475461.1    |
| <i>Collinsella intestinalis</i> DSM 13280                              |                 | LarR                 | ZP_04446027.1  | hypothetical protein COLINT_02751                                                                        | ZP_04446028.1     |
| <i>Collinsella tanakaei</i> YIT 12063                                  |                 |                      |                |                                                                                                          |                   |
|                                                                        | 1               | LarR                 | ZP_08853122.1  | hypothetical protein HMPREF9452_00991                                                                    | ZP_08853123.1     |
|                                                                        | 2               |                      | ZP_08853117.1  | hypothetical protein HMPREF9452_00986                                                                    |                   |
| <i>Enterococcus casseliflavus</i> ATCC 12755                           |                 |                      | ZP_08145504.1  | crp/Fnr family transcriptional regulator                                                                 |                   |
| <i>Enterococcus faecalis</i> T3                                        |                 |                      |                |                                                                                                          |                   |
|                                                                        | 1               | LarR                 | ZP_05503397.1  | transcription regulator                                                                                  | ZP_05503398.1     |
|                                                                        | 2               | Ers                  | ZP_05502499.1  | transcriptional regulator                                                                                |                   |
| <i>Enterococcus faecium</i> E0045                                      |                 |                      | ZP_19440287.1  | CarD family transcriptional regulator                                                                    |                   |
| <i>Enterococcus gallinarum</i> EG2                                     |                 |                      | ZP_05648526.1  | transcriptional regulator                                                                                |                   |
| <i>Enterococcus hirae</i> ATCC 9790                                    |                 |                      | YP_006487412.1 | Crp/Fnr family transcriptional regulator                                                                 |                   |
| <i>Enterococcus italicus</i> DSM 15952                                 |                 |                      | ZP_07896383.1  | crp/Fnr family transcriptional regulator                                                                 |                   |
| <i>Enterococcus</i> sp. 7L76                                           |                 |                      | CBL31034.1     | cAMP-binding proteins-catabolite gene activator and regulatory subunit of cAMP-dependent protein kinases |                   |
| <i>Eubacterium bifforme</i> DSM 3989                                   |                 |                      |                |                                                                                                          |                   |
|                                                                        | 1               | LarR                 | ZP_03487930.1  | hypothetical protein EUBIFOR_00495                                                                       | ZP_03487929.1     |
|                                                                        | 2               |                      | ZP_03489375.1  | hypothetical protein EUBIFOR_01964                                                                       |                   |
|                                                                        | 3               |                      | ZP_03487649.1  | hypothetical protein EUBIFOR_00208                                                                       |                   |
|                                                                        | 4               |                      | ZP_03487783.1  | hypothetical protein EUBIFOR_00348                                                                       |                   |
| <i>Eubacterium hallii</i> DSM 3353                                     |                 | LarR                 | ZP_03715095.1  | hypothetical protein EUBHAL_00131                                                                        | ZP_03715096.1     |
| <i>Granulicatella adiacens</i> ATCC 49175                              |                 | LarR                 | ZP_05738512.1  | Crp/Fnr family transcriptional regulator                                                                 | ZP_05738513.1     |
| <i>Granulicatella elegans</i> ATCC 700633                              |                 | LarR                 | ZP_05852068.1  | transcriptional regulator, Crp/Fnr family                                                                | ZP_05852067.1     |
| <i>Lactobacillus brevis</i> ATCC 367                                   |                 | LarR                 | YP_795942.1    | cAMP-binding protein                                                                                     | YP_795943.1       |
| <i>Lactobacillus coryniformis</i> subsp. <i>coryniformis</i> KCTC 3167 |                 | LarR                 | ZP_08478609.1  | transcription regulator                                                                                  | ZP_08478608.1     |
| <i>Lactobacillus curvatus</i> CRL 705                                  |                 | LarR                 | ZP_09041129.1  | bacterial regulatory s, crp family protein                                                               | ZP_09041121.1     |
| <i>Lactobacillus fermentum</i> IFO 3956                                |                 | LarR                 | YP_001844550.1 | transcriptional regulator                                                                                | YP_001844549.1    |
| <i>Lactobacillus mali</i> KCTC 3596 = DSM 20444                        |                 | LarR                 | ZP_09448267.1  | cAMP-binding protein                                                                                     | ZP_09448266.1     |
| <i>Lactobacillus pentosus</i> MP-10                                    |                 | LarR                 | CCB81962.1     | transcription regulator                                                                                  | CCB81961.1        |
| <i>Lactobacillus plantarum</i> WCFS1                                   |                 | LarR                 | YP_004888173.1 | Crp/FNR family transcriptional regulator                                                                 | YP_004888174.1    |
| <i>Lactobacillus sakei</i> subsp. <i>sakei</i> 23K                     |                 | LarR                 | YP_395397.1    | unnamed protein product                                                                                  | YP_395398.1       |
| <i>Lactococcus garvieae</i> ATCC 49156                                 |                 |                      |                |                                                                                                          |                   |
|                                                                        | 1               |                      | YP_004779753.1 | transcription regulator                                                                                  |                   |

|                                                         |             |                |                                           |                |
|---------------------------------------------------------|-------------|----------------|-------------------------------------------|----------------|
|                                                         | 2           | YP_004778376.1 | transcription regulator                   |                |
| <i>Lactococcus lactis</i> subsp. <i>cremoris</i> MG1363 |             |                |                                           |                |
|                                                         | RcfB        | YP_001033749.1 | rcfB gene product                         |                |
| <i>Lactococcus lactis</i> subsp. <i>lactis</i> KF147    |             |                |                                           |                |
|                                                         |             | YP_003354892.1 | Crp family transcriptional regulator      |                |
| <i>Listeria grayi</i> DSM 20601                         |             |                |                                           |                |
|                                                         | 1           | ZP_07052624.1  | crp/Fnr family transcriptional regulator  |                |
|                                                         | 2           | ZP_07052673.1  | global nitrogen regulator NtcA            |                |
| <i>Listeria innocua</i> Clip11262                       |             |                |                                           |                |
|                                                         |             | NP_470555.1    | hypothetical protein lin1218              |                |
| <i>Listeria ivanovii</i> subsp. <i>ivanovii</i> PAM 55  |             |                |                                           |                |
|                                                         |             | YP_004854974.1 | putative regulator of the Fnr CRP family  |                |
| <i>Listeria marthii</i> FSL S4-120                      |             |                |                                           |                |
|                                                         |             | ZP_07870549.1  | Crp/FNR family transcriptional regulator  |                |
| <i>Listeria monocytogenes</i> EGD-e                     |             |                |                                           |                |
|                                                         | 1 PrfA      | NP_463731.1    | listeriolysin positive regulatory protein |                |
|                                                         | 2 PrfA like | NP_464776.1    | hypothetical protein lmo1251              |                |
| <i>Listeria seeligeri</i> FSL N1-067                    |             |                |                                           |                |
|                                                         |             | ZP_16495800.1  | Crp/FNR family transcriptional regulator  |                |
| <i>Listeria welshimeri</i> serovar 6b str. SLCC5334     |             |                |                                           |                |
|                                                         |             | YP_849464.1    | Crp/FNR family transcriptional regulator  |                |
| <i>Listeriaceae bacterium</i> TTU M1-001                |             |                |                                           |                |
|                                                         |             | ZP_09893295.1  | Crp/FNR family transcriptional regulator  |                |
| <i>Pediococcus clausenii</i> ATCC BAA-344               |             |                |                                           |                |
|                                                         | LarR        | YP_005005673.1 | unnamed protein product                   | YP_005005672.1 |
| <i>Pediococcus pentosaceus</i> ATCC 25745               |             |                |                                           |                |
|                                                         | LarR        | YP_805158.1    | cAMP-binding protein                      | YP_805157.1    |
| <i>Pseudomonas putida</i> KT2440                        |             |                |                                           |                |
|                                                         | Crp         | NP_742590.1    | cAMP-regulatory protein                   |                |
| <i>Sporolactobacillus inulinus</i> CASD                 |             |                |                                           |                |
|                                                         | LarR        | ZP_09714632.1  | transcription regulator                   | ZP_09714633.1  |
| <i>Streptococcus agalactiae</i> ATCC 13813              |             |                |                                           |                |
|                                                         |             | ZP_08649995.1  | crp/Fnr family transcriptional regulator  |                |
| <i>Streptococcus equi</i> subsp. <i>zooepidemicus</i>   |             |                |                                           |                |
|                                                         |             | YP_002745168.1 | Crp family regulatory protein             |                |
| <i>Streptococcus ictaluri</i> 707-05                    |             |                |                                           |                |
|                                                         |             | ZP_09124891.1  | transcriptional regulator, Crp/Fnr family |                |
| <i>Streptococcus pyogenes</i> M1 GAS                    |             |                |                                           |                |
|                                                         | Srv         | NP_269852.1    | transcription regulator Srv               |                |
| <i>Streptococcus urinalis</i> 2285-97                   |             |                |                                           |                |
|                                                         |             | ZP_09136776.1  | transcriptional regulator, Crp/Fnr family |                |
| <i>Streptococcus vestibularis</i> F0396                 |             |                |                                           |                |
|                                                         | LarR        | ZP_07723811.1  | transcriptional regulator, Crp/Fnr family | ZP_07724144.1  |
| <i>Weissella koreensis</i> KACC 15510                   |             |                |                                           |                |
|                                                         | 1           | YP_004725607.1 | unnamed protein product                   |                |
|                                                         | 2           | YP_004725591.1 | unnamed protein product                   |                |
|                                                         | 3           | YP_004726285.1 | unnamed protein product                   |                |

<sup>a</sup> The LarR homologs are numbered when several paralogs are found in the same species. These numbers are reported in Fig .S1

<sup>b</sup> The identification of LarR proteins is based on the synteny with a *larA* gene

<sup>c</sup> When present, the NCBI accession numbers of *L. plantarum* LarA homologs are indicated

## References

1. **Le SQ, Gascuel O.** 2008. An improved general amino acid replacement matrix. *Mol. Biol. Evol.* **25**:1307-1320.
2. **Tamura K, Stecher G, Peterson D, Filipski A, Kumar S.** 2013. MEGA6: Molecular Evolutionary Genetics Analysis version 6.0. *Mol. Biol. Evol.* **30**:2725-2729.
